# Supplementary material for: A biodegradable, highly sensitive and multifunctional mechanical sensor based on rGO-silk fibroin hydrogel for human motion detection and gesture recognition
Source: Royal Society of Chemistry journal article supplement (doi:10.1039/d3ta05537j), 2023-12-08

Electronic Supplementary Material (ESI) for Journal of Materials Chemistry A.  
This journal is © The Royal Society of Chemistry 2023

## **Electronic supplementary information**

*A biodegradable, highly sensitive and multifunctional  
mechanical sensor based on rGO-silk fibroin hydrogel for  
human motion detection and gesture recognition*

*Ke Chen,<sup>a</sup> Baoyang Liu,<sup>a</sup> Ning Hu,<sup>a</sup> Qiaolin Fan,<sup>a</sup> Fawang Zhan,<sup>b</sup> Zhou Zhang,<sup>b</sup>*

*Zhonghua Ni,<sup>a</sup> Xiao Li,<sup>a\*</sup> Tao Hu<sup>a\*</sup>*

<sup>a</sup> School of Mechanical Engineering, and Jiangsu Key Laboratory for Design and  
Manufacture of Micro-Nano Biomedical Instruments, Southeast University, Nanjing  
211189, Jiangsu Province, China

<sup>b</sup> Central South (Shangrao) Metallurgical Industry Research Institute Co., Ltd.  
Shangrao, 334000, Jiangxi Province, China

Corresponding Author

\*E-mail: hutao@seu.edu.cn (Tao Hu), lx2016@seu.edu.cn (Xiao Li)

**This file contains:**

S1. Supporting figures: Figure S1~S18

S2. Supporting tables: Table S1~S5

S3. Supporting video for human-machine interaction

**S1. Supporting figures: Figure S1~S17**

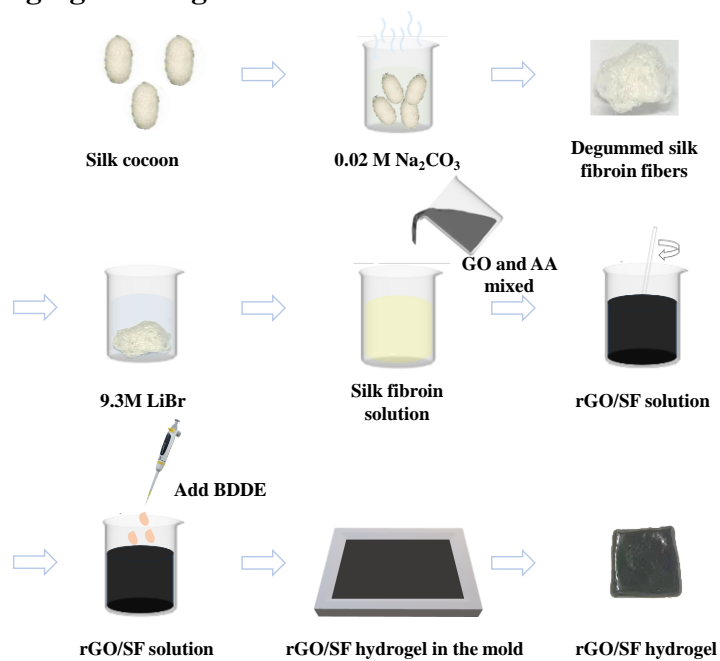

**Figure S1.** Fabrication process of rGO/SF hydrogel

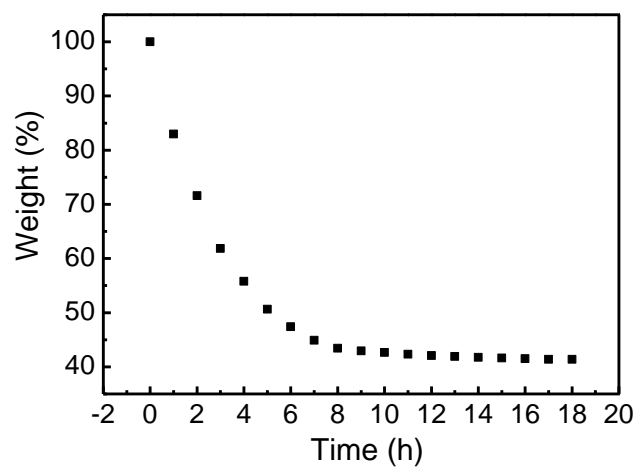

**Figure S2.** Mass change of rGO/SF hydrogel in room temperature condition

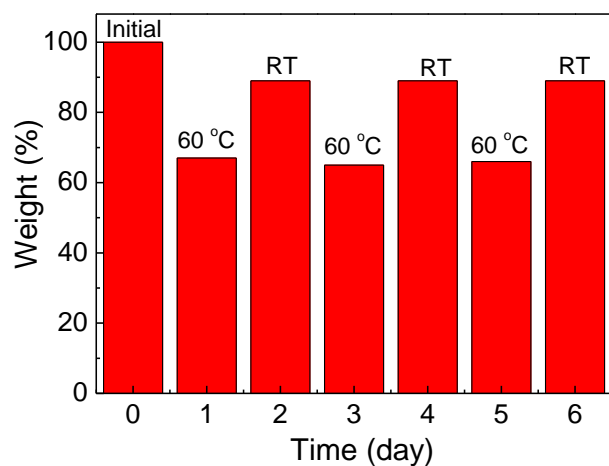

**Figure S3.** The moisturizing property of rGO/SF hydrogel

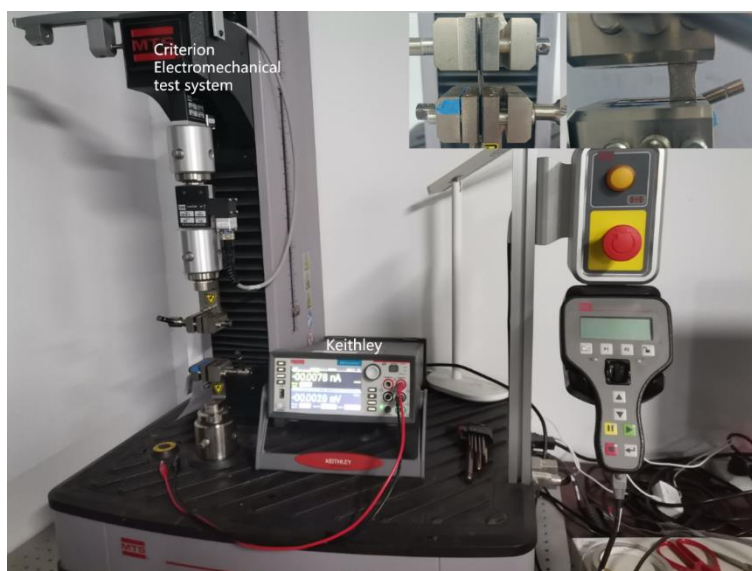

**Figure S4.** Picture of the criterion electromechanical test equipment

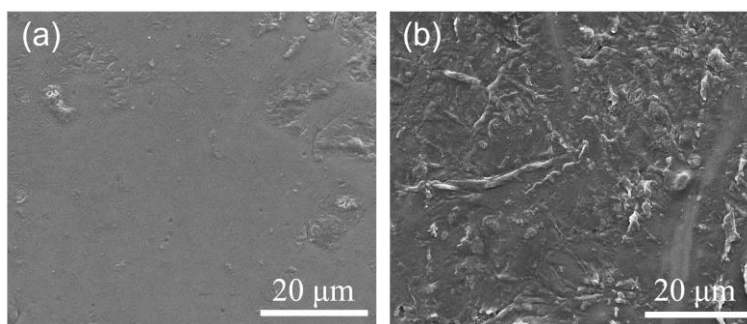

**Figure S5.** SEM images of the surface morphology of (a) pure silk fibroin hydrogel; (b) rGO/SF hydrogel

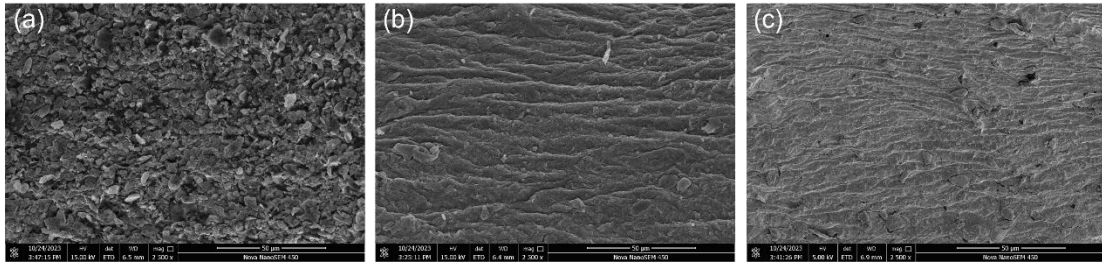

**Figure S6.** SEM images of the internal structure of rGO/SF hydrogel (a) at its original state, (b) after strain sensing, (c) after pressure detection.

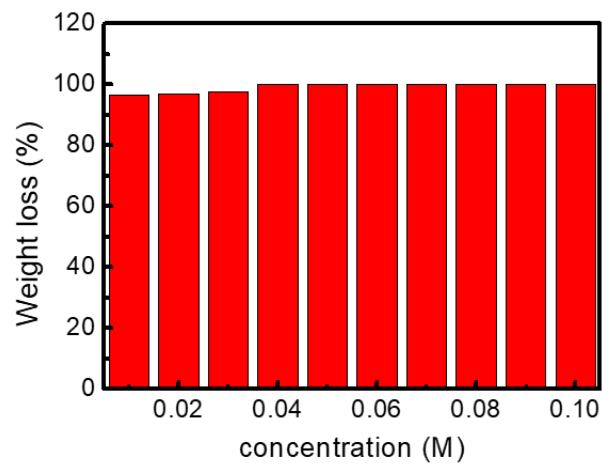

**Figure S7.** Degradation effect of NaOH solution with different concentration.

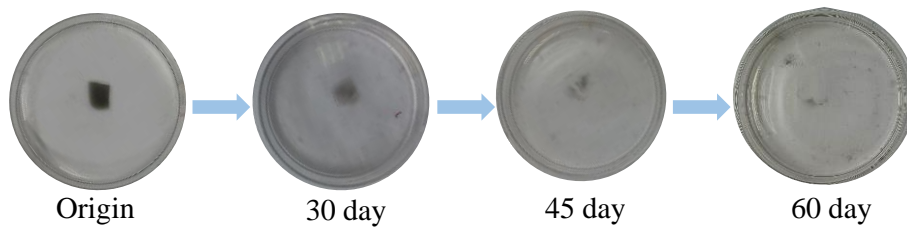

**Figure S8.** Degradation assessment of rGO/SF hydrogel. Sequential photographs of degradation of rGO/SF hydrogel placed in deionized water.

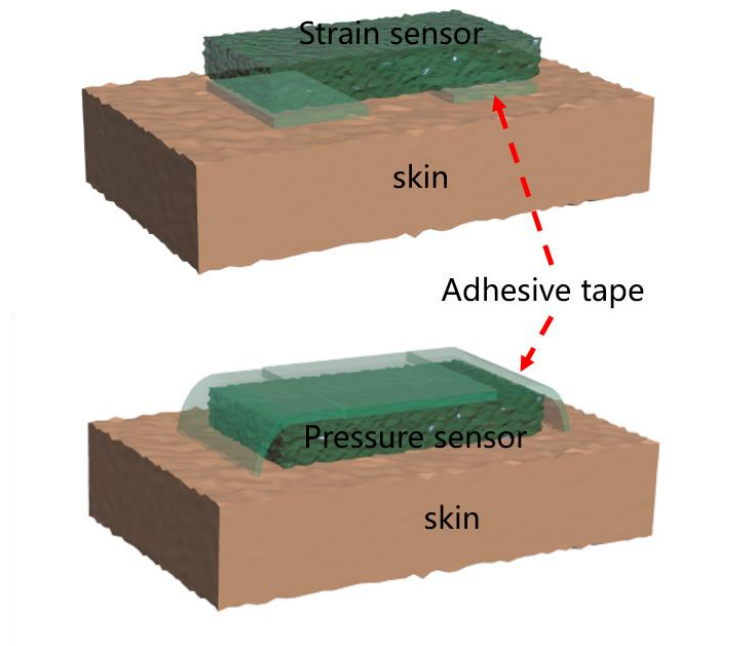

**Figure S9.** Schematic diagram of tension test and pressure test for human signals detection.

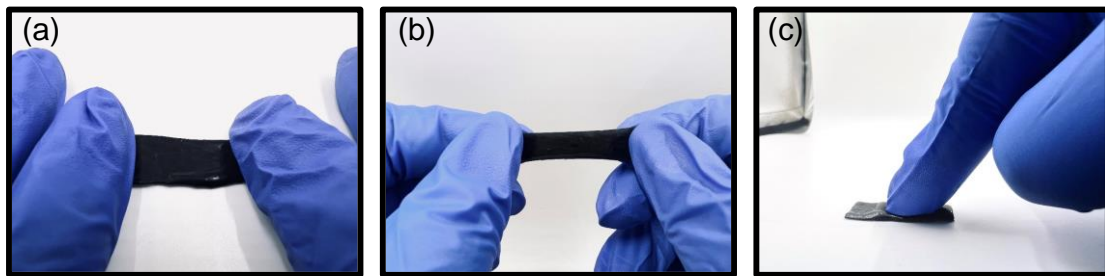

**Figure S10.** Photographs of rGO/SF hydrogel. (a) original; (b) strain; (c) pressure.

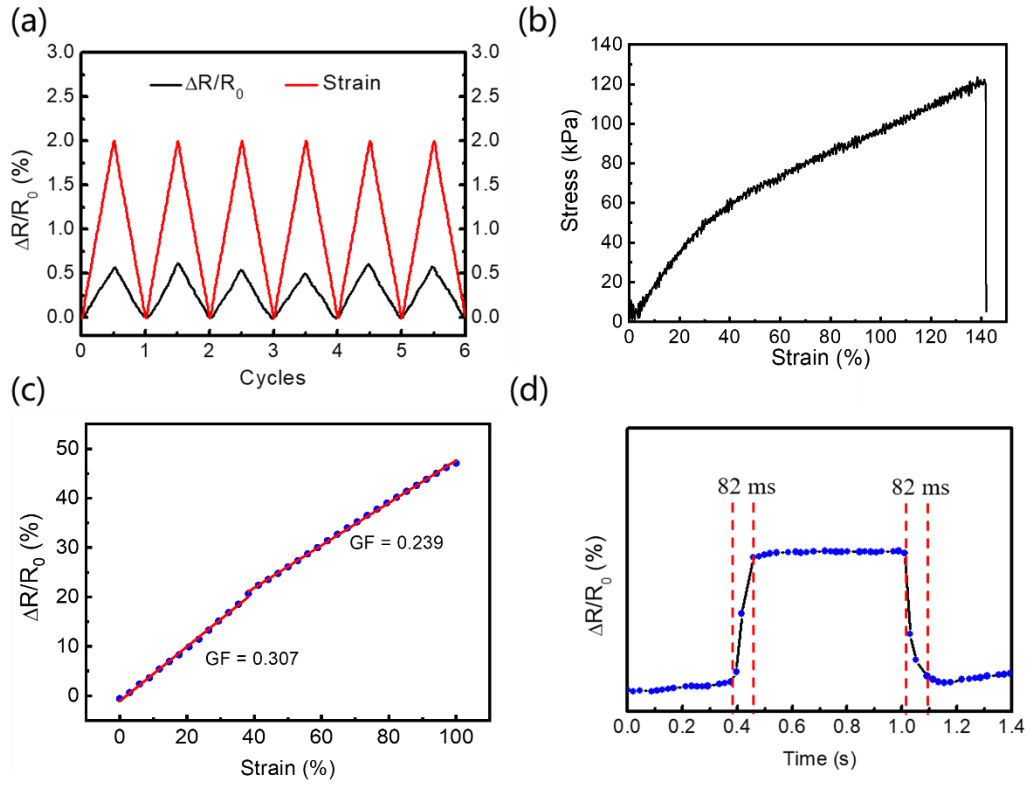

**Figure S11.** Performance of the rGO/SF strain sensor. (a) Diagram of cycling strain; (b) Diagram of strength limit of rGO/SF strain sensor; (c) Gauge factors of the rGO/SF strain sensor; (d) Response time of rGO/SF strain sensor.

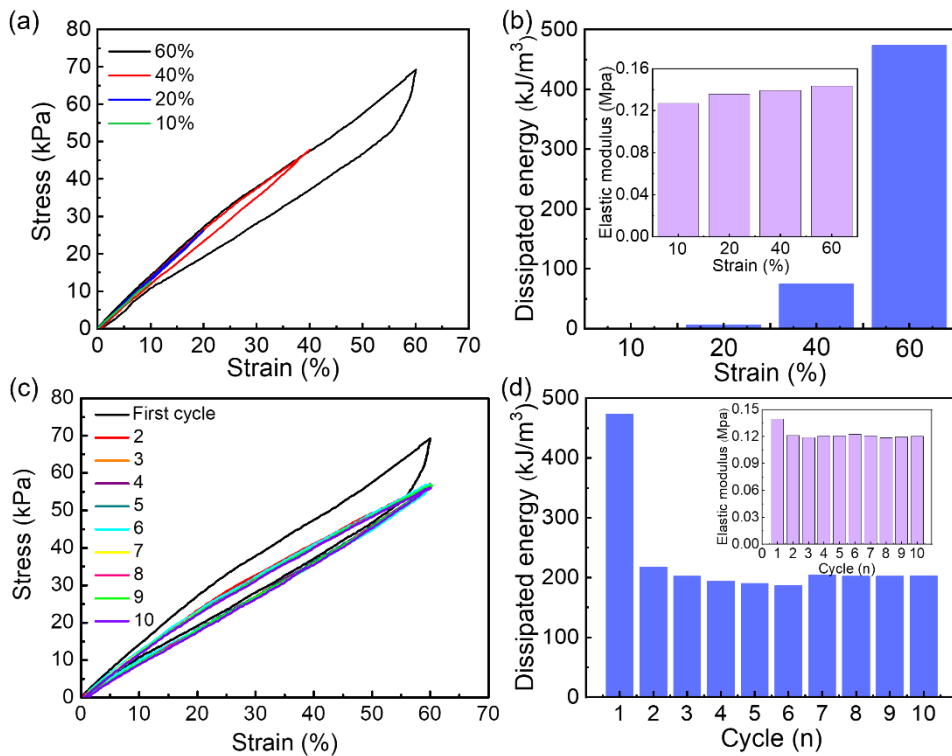

**Figure S12.** The loading-unloading tests of the rGO/SF hydrogel under various

conditions. (a) Tensile stress-strain curves and (b) corresponding dissipated energy at different maximum strain; (c) Ten successive cyclic stress-strain curves at maximum strain of 60%. (d) The dissipated energy with regard to different cycle. (Insets in (b) and (d) are the corresponding value of elastic modulus)

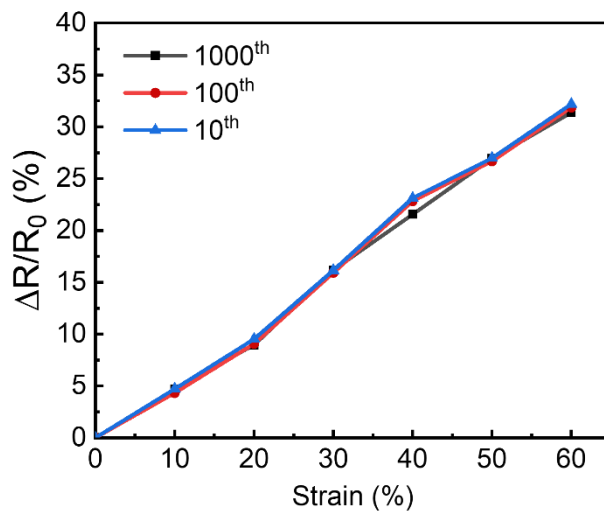

**Figure S13.** Relative change in resistance versus strain curves for 10 (blue), 100 (red), and 1000 (black) cycles with the strain ranging from 0% to 60%.

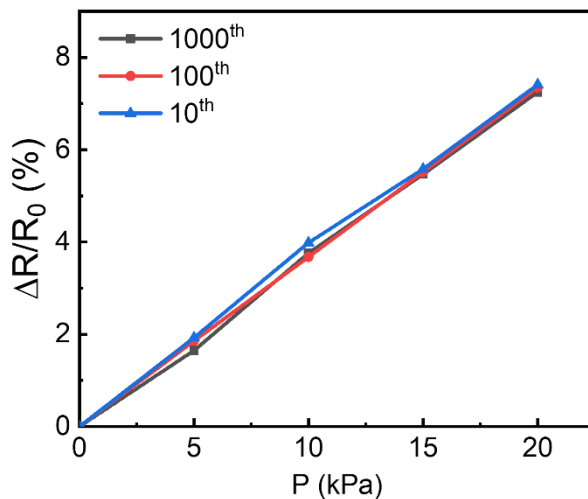

**Figure S14.** Relative change in resistance versus pressure curves for 10 (blue), 100 (red), and 1000 (black) cycles with the pressure ranging from 0 kPa to 20 kPa.



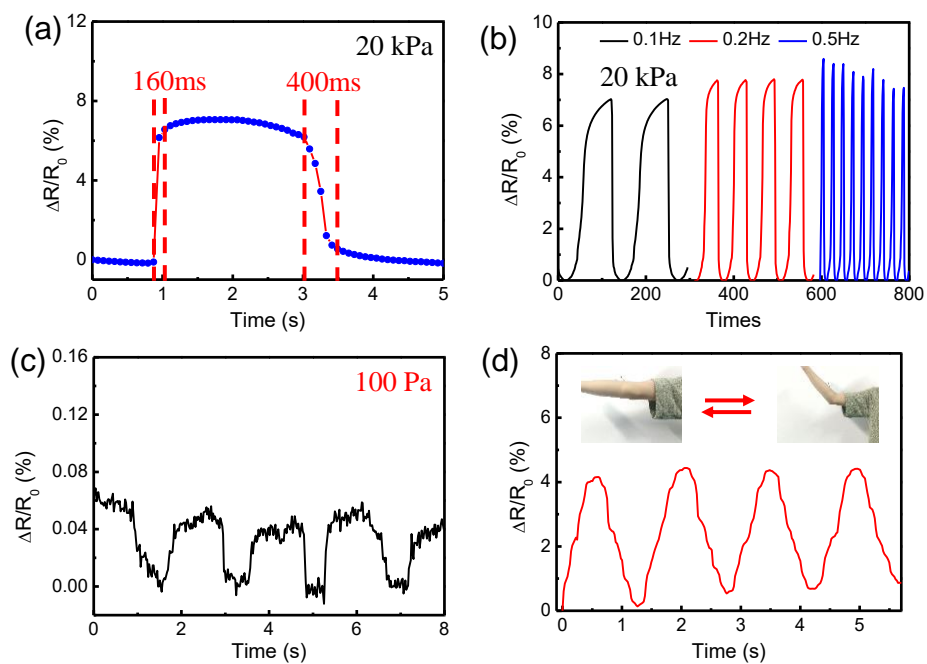

**Figure S15.** Performance of the rGO/SF pressure sensor. (a) Response time of rGO/SF pressure sensor; (b) Relative resistance variation under cycling stretching/releasing at frequencies of 0.2, 0.5 and 1 Hz; (c) Detection limit test of pressure sensor; (d) Signal responses at elbow joint bending.

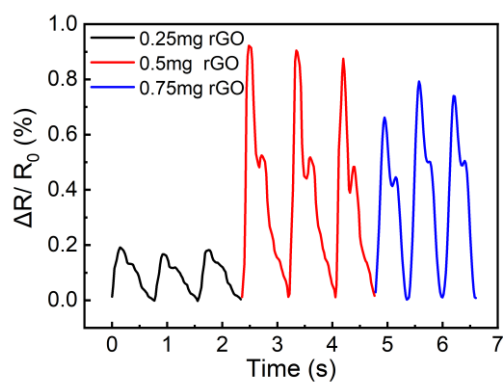

**Figure S16.** Detection of pulse signals at different concentration of rGO

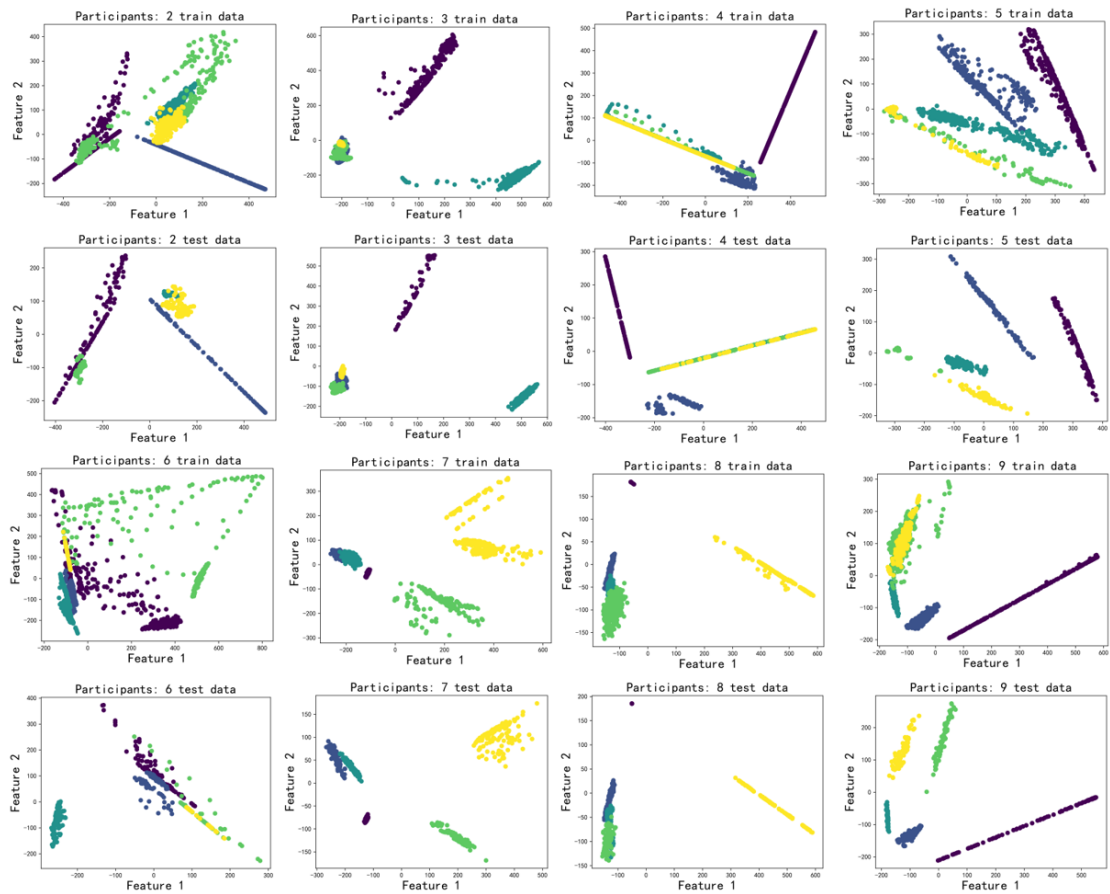

**Figure S17.** The PCA visualization of the train data and test data of Participant 2-9.

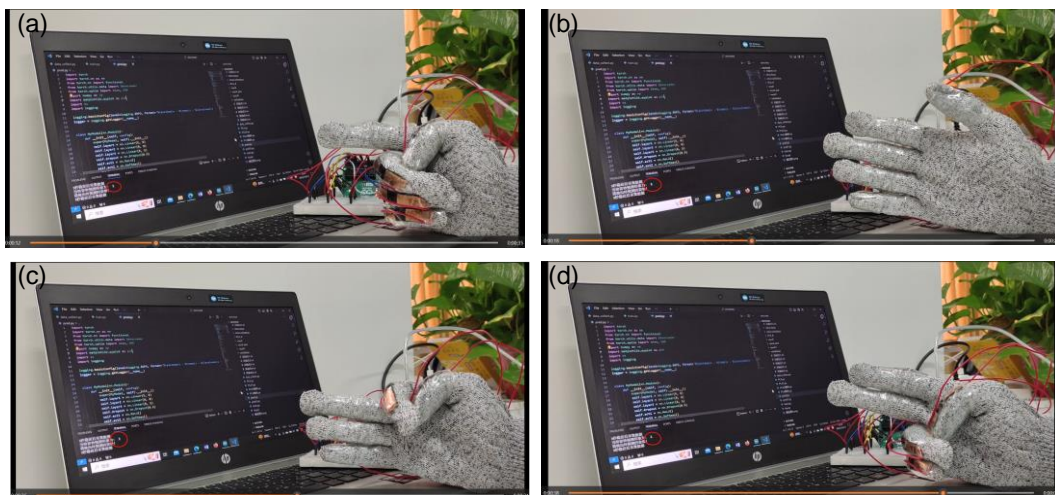

**Figure S18.** Human-machine recognition of (a) gesture 1; (b) gesture 5; (c) gesture 3; (d) gesture 2.

## S2. Supporting tables: Table S1~S5

**Table S1.** Comparison of our multifunctional mechanical sensor with current reported strain sensors and pressure sensors

| Sensing device                    | Materials     | Dynamic range                                  | Sensitivity                                                                                                                                    | References        |
|-----------------------------------|---------------|------------------------------------------------|------------------------------------------------------------------------------------------------------------------------------------------------|-------------------|
| Strain sensor                     | CNT/Ecoflex   | 900%                                           | 0.54(0-400%)                                                                                                                                   | S1                |
| Strain sensor                     | SWCNT/PDMS    | 280%                                           | 0.82(<40%)<br>0.06(60%-200%)                                                                                                                   | S2                |
| Pressure sensor                   | CNT/Ecoflex   | 700%                                           | 0.65(<400%)                                                                                                                                    | S3                |
| Pressure sensor                   | CNT/Ecoflex   | 0.1Pa-130kPa                                   | 0.601kPa <sup>-1</sup> (<5kPa)<br>0.077kPa <sup>-1</sup> (30-130kPa)                                                                           | S4                |
| Pressure sensor                   | rGO/Ag        | 40kPa                                          | 0.016kPa <sup>-1</sup>                                                                                                                         | S5                |
| Pressure sensor                   | rGO/PI        |                                                | 0.18kPa <sup>-1</sup> (0-1.5kPa)<br>0.023kPa <sup>-1</sup> (3.5-6.5kPa)                                                                        | S6                |
| <b>Pressure and strain sensor</b> | <b>rGO/SF</b> | <b>&gt;500kPa (Pressure)<br/>100% (Strain)</b> | <b>Pressure:<br/>0.4kPa<sup>-1</sup> (0.1-100kPa)、<br/>0.1kPa<sup>-1</sup> (100-500kPa)<br/>Strain:<br/>0.307(&lt;41%)、<br/>0.239(41-100%)</b> | <b>Our sensor</b> |

**Table S2.** Test accuracy of individual personalized gesture recognition systems

| Participants  | Accuracy |
|---------------|----------|
| Participants1 | ≈95%     |
| Participants2 | ≈90%     |
| Participants3 | ≈90%     |
| Participants4 | ≈90%     |
| Participants5 | ≈80%     |
| Participants6 | ≈100%    |

|               |       |
|---------------|-------|
| Participants7 | ≈100% |
| Participants8 | ≈100% |
| Participants9 | ≈95%  |

**Table S3.** Size of Hidden Layers

| Hidden size1 | Hidden size1 | Accuracy |
|--------------|--------------|----------|
| 64           | 256          | ≈40%     |
| 64           | 128          | ≈40%     |
| 64           | 64           | ≈60%     |
| 32           | 64           | ≈60%     |
| 32           | 32           | ≈60%     |
| 16           | 32           | ≈60%     |
| 16           | 16           | ≈60%     |
| 8            | 16           | ≈60%     |
| 8            | 8            | ≈80%     |
| 4            | 8            | ≈60%     |
| 4            | 4            | ≈60%     |

**Table S4.** Learning rate

| Learning rate | Accuracy |
|---------------|----------|
| 1e-2          | ≈40%     |
| 1e-3          | ≈80%     |
| 1e-4          | ≈50%     |
| 1e-5          | ≈55%     |

**Table S5.** Batch size

| Batch size | Accuracy |
|------------|----------|
| 64         | ≈50%     |
| 32         | ≈60%     |
| 16         | ≈60%     |
| 8          | ≈80%     |
| 4          | ≈60%     |

## References

- S1. Seongwoo Ryu, Phillip Lee, Jeffrey B. Chou, Ruize Xu, Rong Zhao, Anastasios John Hart, Sang-Gook Kim. *ACS Nano*, 2015, 9, 5929.
- S2 Takeo Yamada, Yuhei Hayamizu, Yuki Yamamoto, Yoshiki Yomogida, Ali Izadi-Najafabadi, Don N. Futaba, Kenji Hata. *Nature Nanotechnology*. 2011, 6, 296.
- S3 Park Sun-Jun, Kim Joshua, Chu Michael, Khine Michelle. *Advanced Materials Technologies*. 2016, 1, 1600053.
- S4 Kwon Donguk, Lee Tae-ik, Shim Jongmin, Ryu Seunghwa, Kim Min Seong, Kim Seunghwan, Kim Taek-Soo, Park Inkyu. *ACS Applied Materials & Interfaces*. 2016, 8, 16922.
- S5 Xuchu Dong, Yong Wei, Song Chen, Yong Lin, Lan Liu, Jing Li. *Composites Science and Technology*. 2018, 155, 108.
- S6 Yuyang Qin, Qingyu Peng, Yujie Ding, Zaishan Lin, Chunhui Wang, Ying Li, Jianjun Li, Ye Yuan, Xiaodong He, Yibin Li. *ACS Nano*, 2022, 9, 8933.

### S3. Supporting video for human-machine interaction

(We have uploaded as a supporting video)

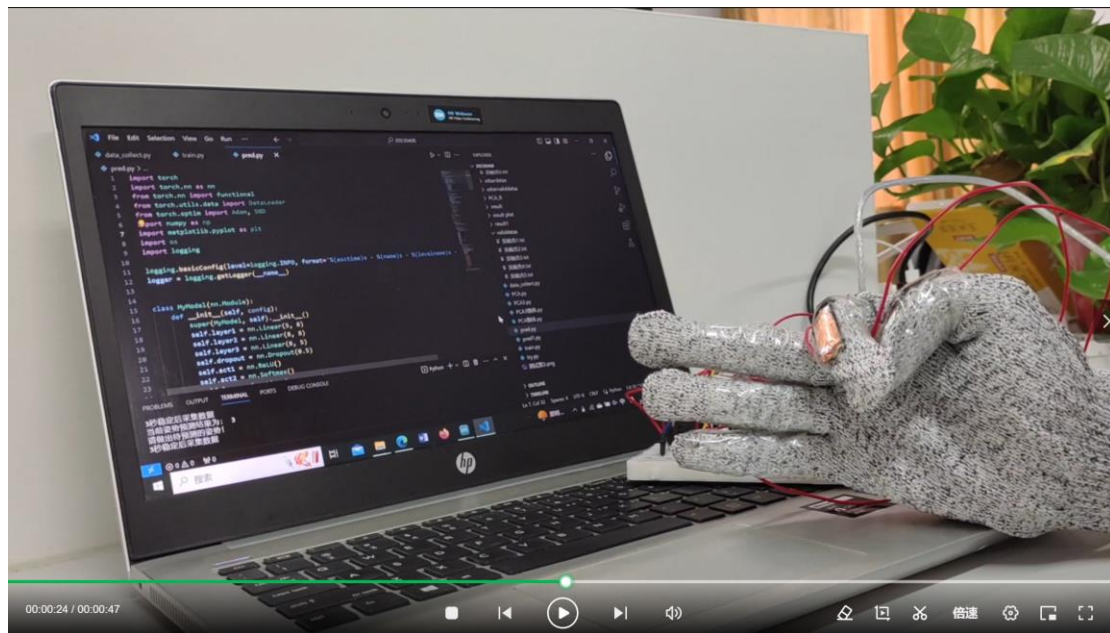

Supplement: d3ta05537j1.pdf [file d3ta05537j1.pdf]
